# Supplementary material
Source: PubMed Central journal article supplement (PMC1568951)

PV Change

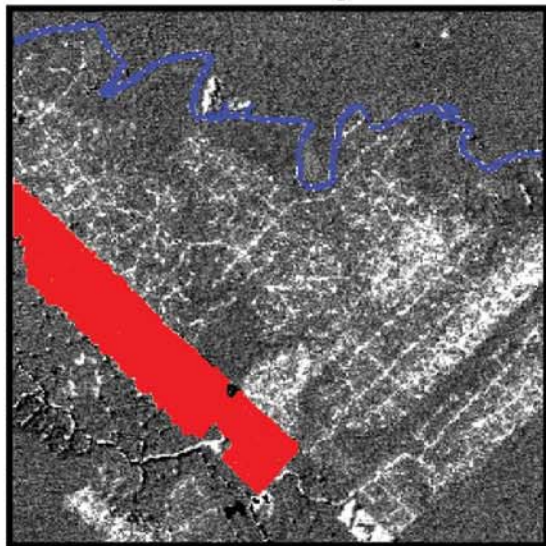

CLAS Logging Map

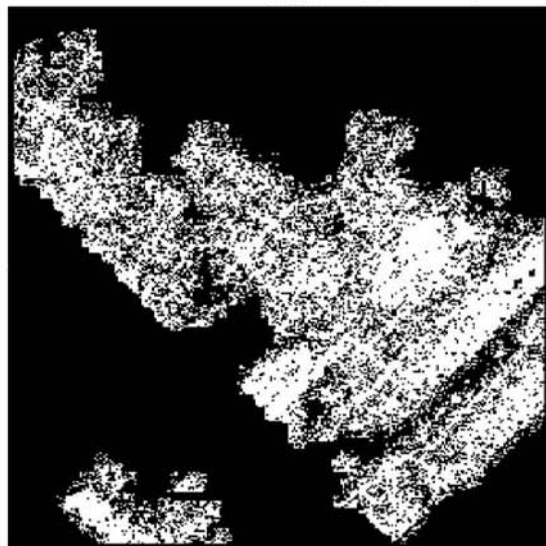

CLAS & PRODES  
Polygons

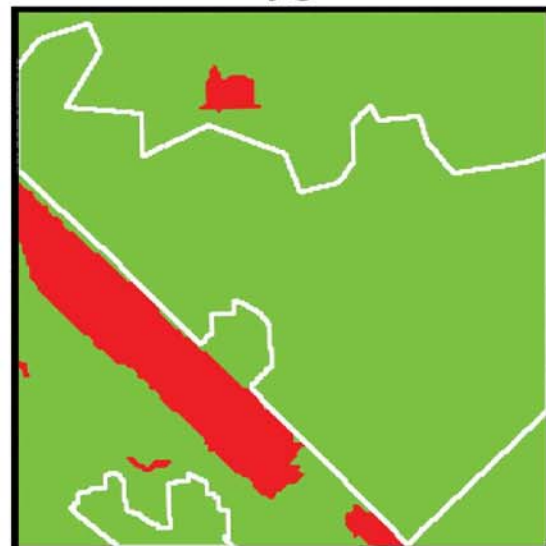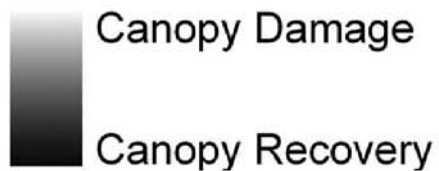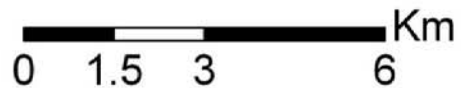

Supplement: pnas_0604093103_2.pdf [file pnas_0604093103_2.pdf]

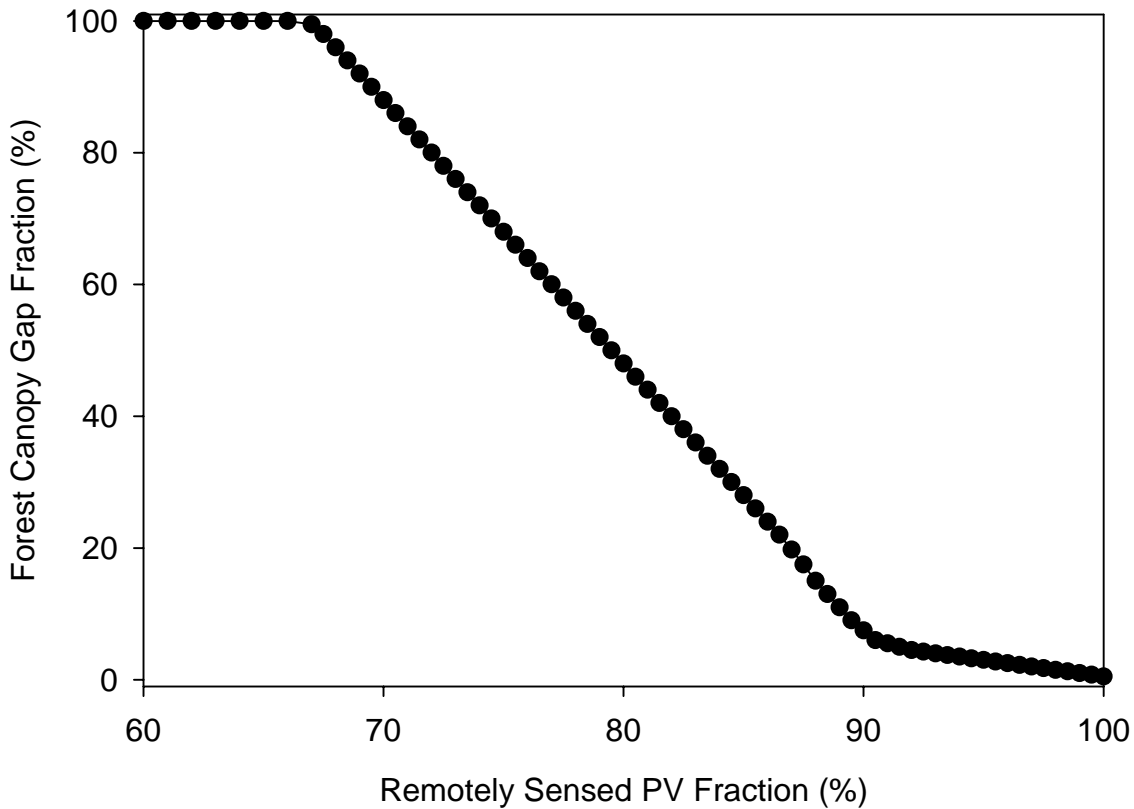

Supplement: pnas_0604093103_3.pdf [file pnas_0604093103_3.pdf]

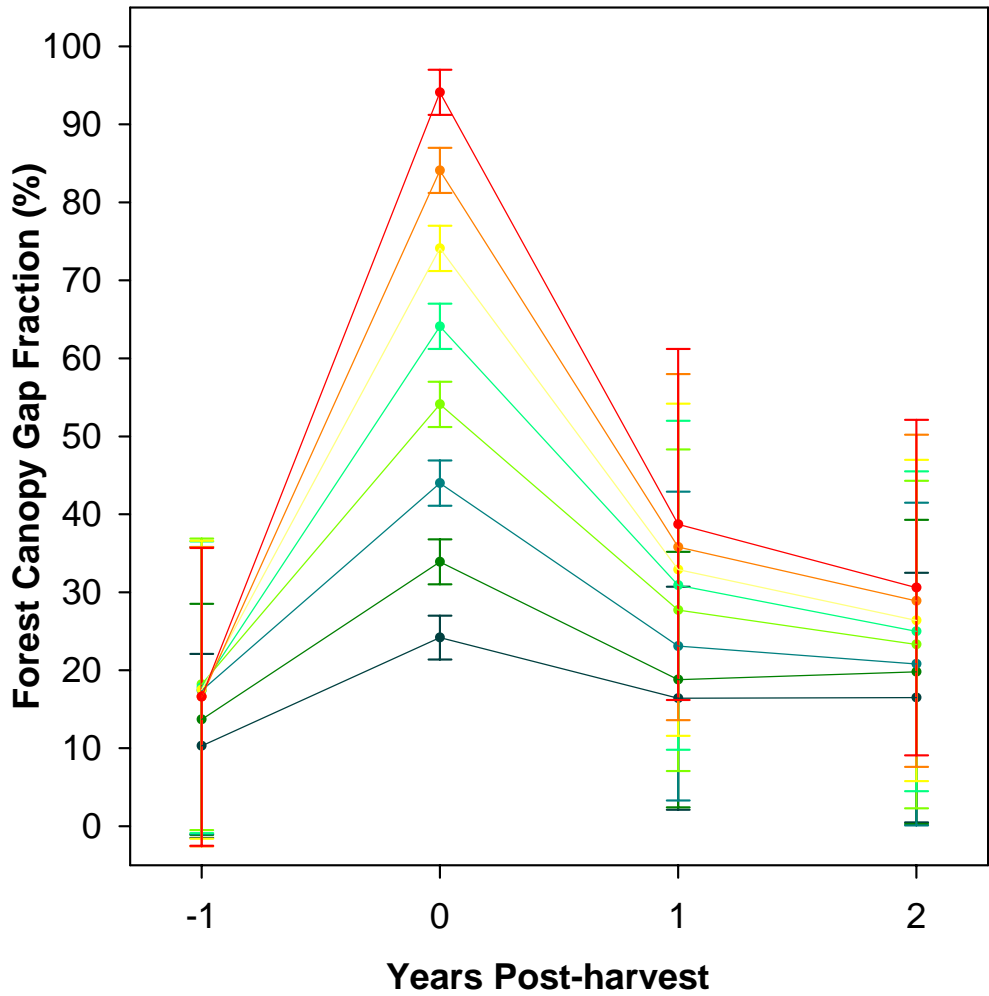

Supplement: pnas_0604093103_5.pdf [file pnas_0604093103_5.pdf]

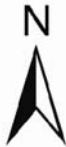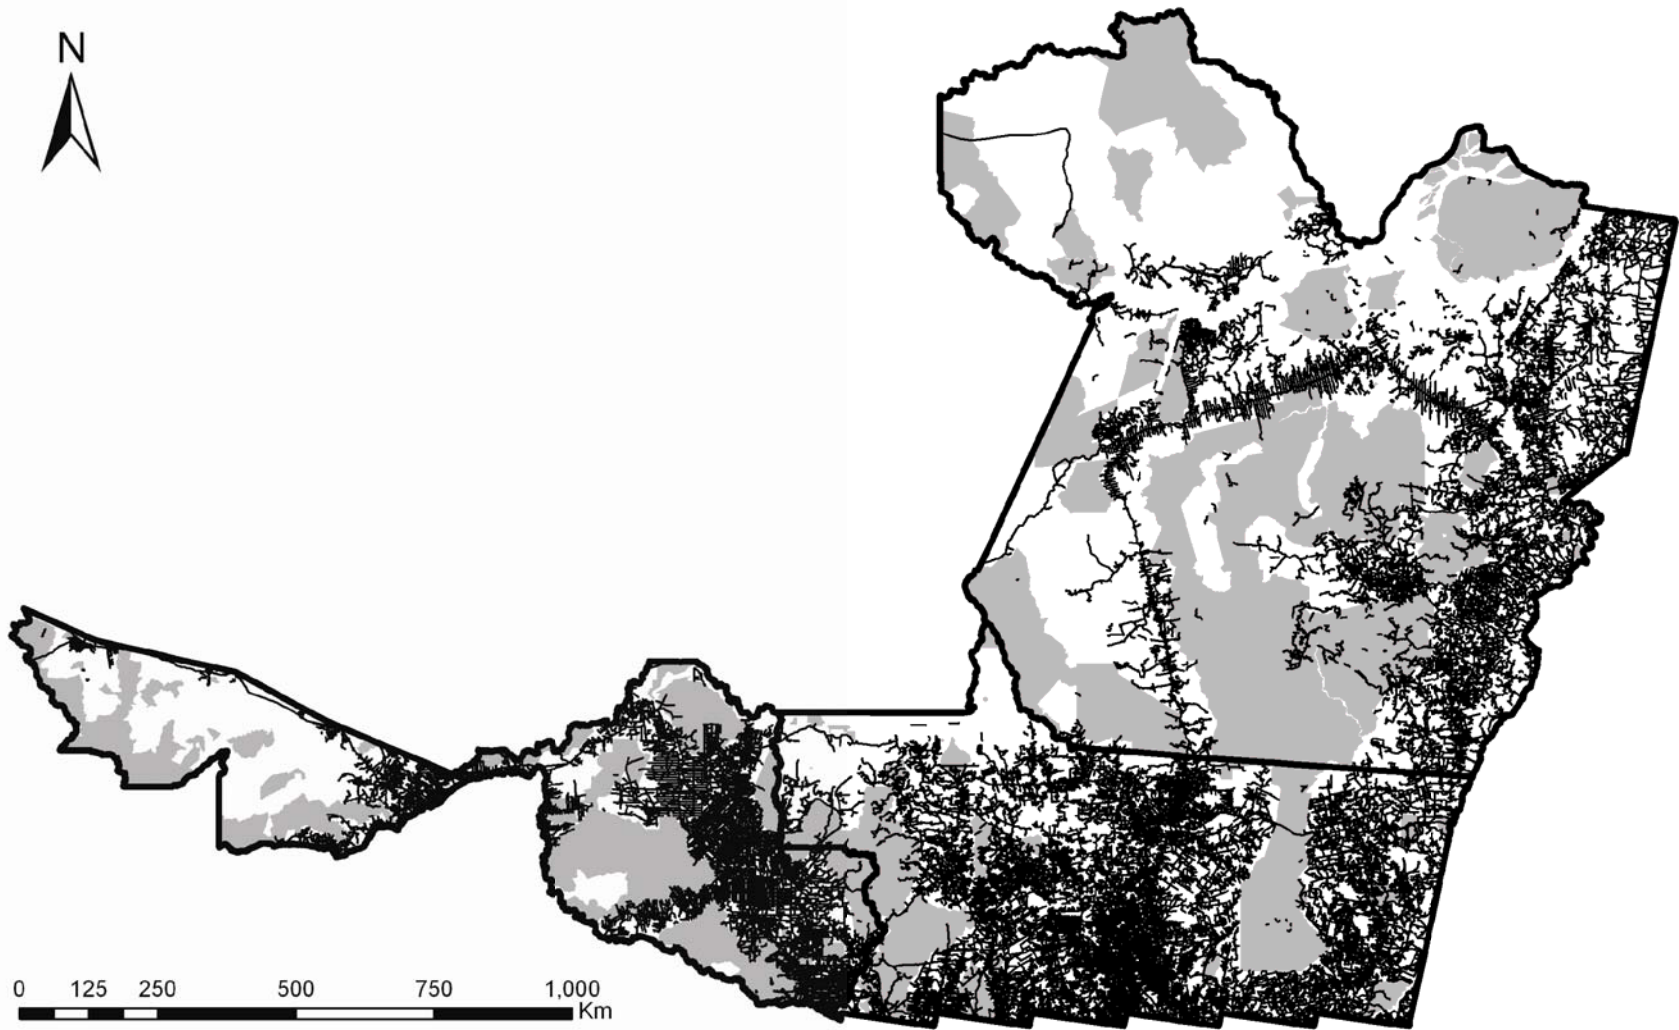

0 125 250 500 750 1,000 Km

Supplement: pnas_0604093103_6.pdf [file pnas_0604093103_6.pdf]

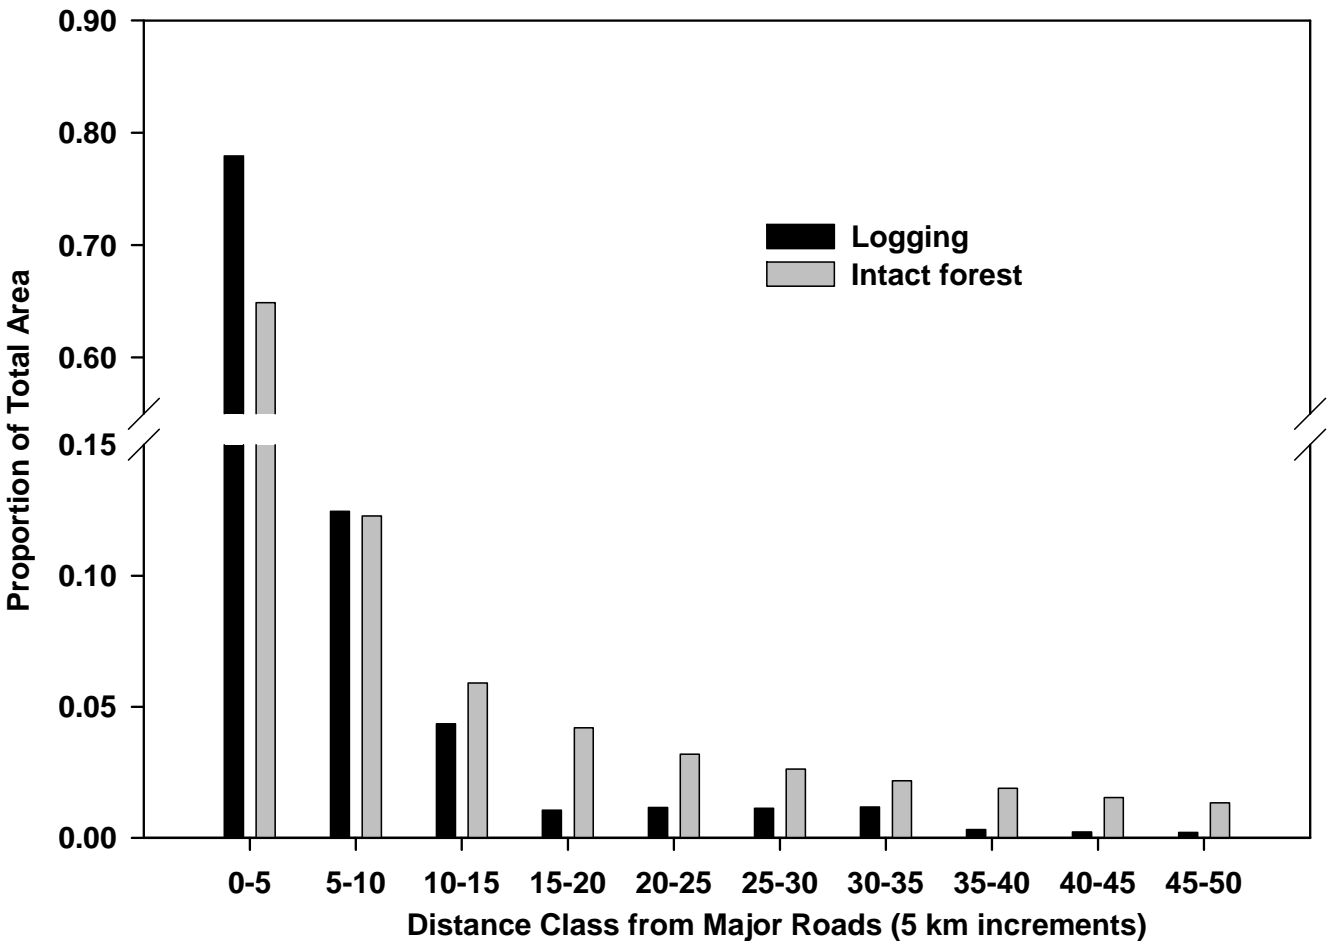

Supplement: pnas_0604093103_7.pdf [file pnas_0604093103_7.pdf]
